# Supplementary material for: Cost effectiveness of adherence to IDSA/ATS guidelines in elderly patients hospitalized for Community-Aquired Pneumonia
Source: Springer Nature journal article supplement (doi:10.1186/s12911-016-0270-y), 2016-03-15
Supplement: MOESM1 [file 9756536]

Additional File 1. Daily antibiotic cost estimates

| <b>Antibiotic</b>                      | <b>Cost (\$)<br/>per dose</b> | <b>Avg #<br/>doses<br/>per day</b> | <b>Cost (\$)<br/>per<br/>treatment day</b> |
|----------------------------------------|-------------------------------|------------------------------------|--------------------------------------------|
| Azithromycin 500mg IV vial             | 7.20                          | 1                                  | 7.20                                       |
| 250mg tablet                           | 7.40                          | 1                                  | 7.40                                       |
| Ceftriaxone 1g IV vial                 | 46.00                         | 1                                  | 46.00                                      |
| Imipenem/Cilastin 500mg IV vial        | 23.52                         | 4                                  | 94.08                                      |
| Piperacillin/Tazobactam 3.375g IV vial | 6.50                          | 4                                  | 26.00                                      |
| Ceftazidime 2g IV vial                 | 19.97                         | 3                                  | 59.91                                      |
| Cefotaxime 1g IV vial                  | 6.60                          | 3                                  | 19.80                                      |
| Cefepime 1g IV vial                    | 20.33                         | 3                                  | 60.99                                      |
| Amoxicillin/clavulanate 875/125 tablet | 4.90                          | 2                                  | 9.80                                       |
| Cefuroxime 1.5g IV vial                | 5.40                          | 2                                  | 10.80                                      |
| 250mg tablet                           | 4.40                          | 2                                  | 8.80                                       |
| Ticarcillin/Clavulanic 3.1g IV vial    | 10.60                         | 4                                  | 42.40                                      |
| Ampicillin/Sulbactam 3g IV vial        | 6.36                          | 4                                  | 25.44                                      |
| Clindamycin 600mg IV dose              | 1.87                          | 3                                  | 5.61                                       |
| 300mg tablet                           | 3.72                          | 3                                  | 11.61                                      |
| Metronidazole 500mg IV bag             | 1.33                          | 3                                  | 3.99                                       |
| 500mg tablet                           | 0.73                          | 3                                  | 2.19                                       |
| Cefazolin 1g IV premixed bag           | 5.04                          | 3                                  | 15.12                                      |
| Piperacillin 4g vial                   | 16.70                         | 4                                  | 66.80                                      |
| Vancomycin IV 1g vial                  | 7.50                          | 2                                  | 15.00                                      |
| Clarithromycin 500mg tablet            | 6.13                          | 2                                  | 12.26                                      |
| Levofloxacin 750mg IV bag              | 13.20                         | 1                                  | 13.20                                      |
| 750mg tablet                           | 19.74                         | 1                                  | 19.74                                      |
| Ciprofloxacin 400mg IV bag             | 3.19                          | 2                                  | 6.38                                       |
| 500mg tablet                           | 3.17                          | 2                                  | 6.34                                       |
| Gentamicin 120mg IV dose               | 7.41                          | 3                                  | 22.23                                      |
| Ampicillin IV 500mg IV vial            | 2.90                          | 4                                  | 11.60                                      |
| Penicillin G = Penicillin 5MU vial     | 8.70                          | 6                                  | 52.20                                      |
| Trim/Sulfameth DS tablet PO            | 1.08                          | 2                                  | 2.16                                       |
| Meropenem 500mg IV vial                | 35.19                         | 4                                  | 140.76                                     |
| Moxifloxacin 400mg bag                 | 42.00                         | 1                                  | 42.00                                      |
| 400mg tablet                           | 22.80                         | 1                                  | 22.80                                      |
| Erythromycin PO 250mg tablet           | 2.50                          | 4                                  | 10.00                                      |
| Chloramphenicol 1g IV vial             | 35.90                         | 4                                  | 143.60                                     |
| Aztreonam 1g IV vial                   | 34.80                         | 3                                  | 104.40                                     |
| Rifampin 600mg IV vial                 | 78.00                         | 1                                  | 78.00                                      |
| 150mg cap x4 caps                      | 6.32                          | 1                                  | 6.32                                       |
