# Supplementary material for: Cost effectiveness of adherence to IDSA/ATS guidelines in elderly patients hospitalized for Community-Aquired Pneumonia
Source: Springer Nature journal article supplement (doi:10.1186/s12911-016-0270-y), 2016-03-15
Supplement: MOESM2 [file 9756536]

Additional File 2. Expert panel survey questionnaire

1) In what country do you practice? \_\_\_\_\_

2) What is your specialty? Internal Medicine

Infectious Disease

Pulmonology / Critical Care

Other

3) What is your academic rank? Fellow/Resident

Assistant Professor

Associate Professor

Professor

4) For how many years have you been practicing medicine since medical school? \_\_\_\_\_

4) What is your age? \_\_\_\_\_

5) What is your gender? Male Female

Please assign your estimated utility, on a scale from 0 to 1, for the average patient age > 65 years old who is hospitalized for community-acquired pneumonia in the following condition:

Admitted to the ICU \_\_\_\_\_

Admitted to the ward, but not well enough to be considered clinically stable \_\_\_\_\_

Admitted to the ward, considered to be clinically stable \_\_\_\_\_
