# Supplementary material for: Cost effectiveness of adherence to IDSA/ATS guidelines in elderly patients hospitalized for Community-Aquired Pneumonia
Source: Springer Nature journal article supplement (doi:10.1186/s12911-016-0270-y), 2016-03-15
Supplement: MOESM3 [file 9756536]

### Adherent

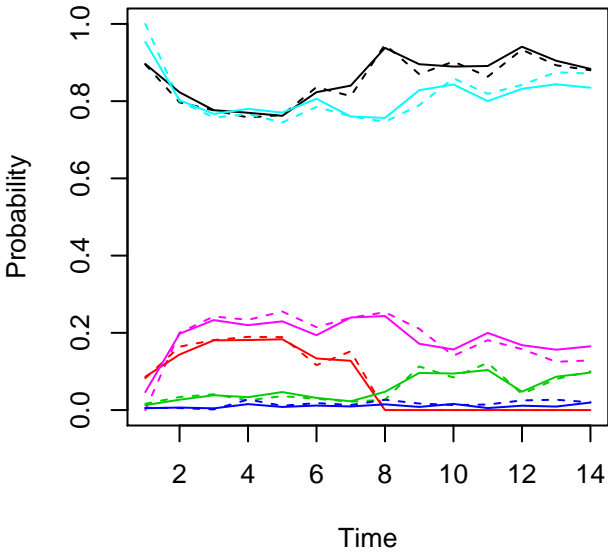

### Under-treated

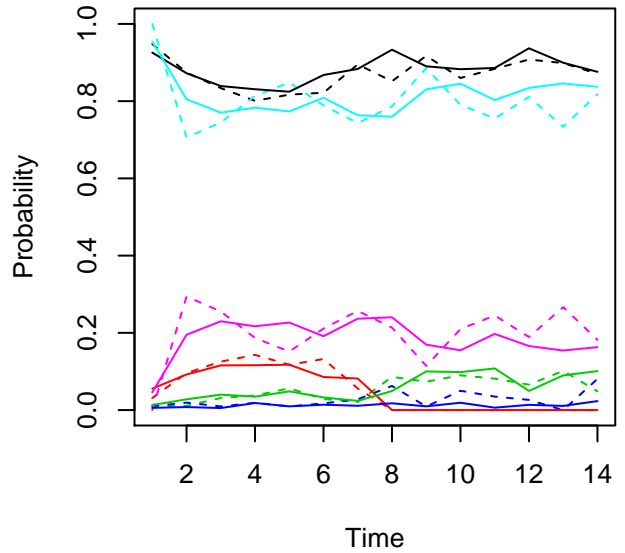

### Over-treated

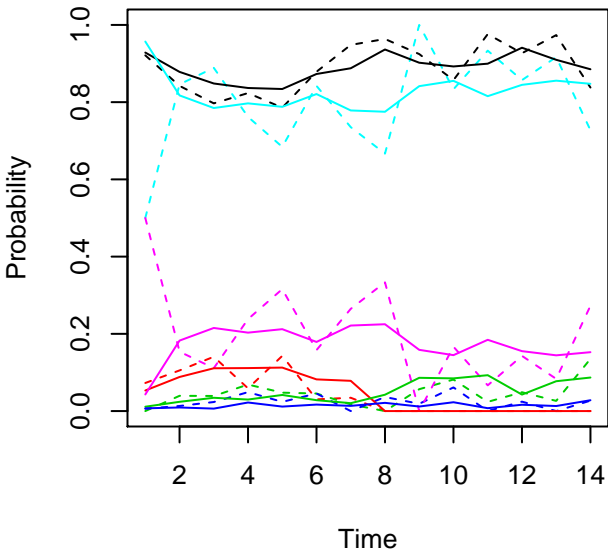

— Cox model (adjusted)  
- - - Non-parametric

— Remain in Admission Status  
— Admission -> Clinically Stable  
— Admission -> Discharge  
— Admission -> In-hospital Death  
— Remain Clinically Stable  
— Clinically Stable -> Discharge
