# Supplementary material for: Cost effectiveness of adherence to IDSA/ATS guidelines in elderly patients hospitalized for Community-Aquired Pneumonia
Source: Springer Nature journal article supplement (doi:10.1186/s12911-016-0270-y), 2016-03-15
Supplement: MOESM5 [file 9756536]

### ICU SOPs, adherent

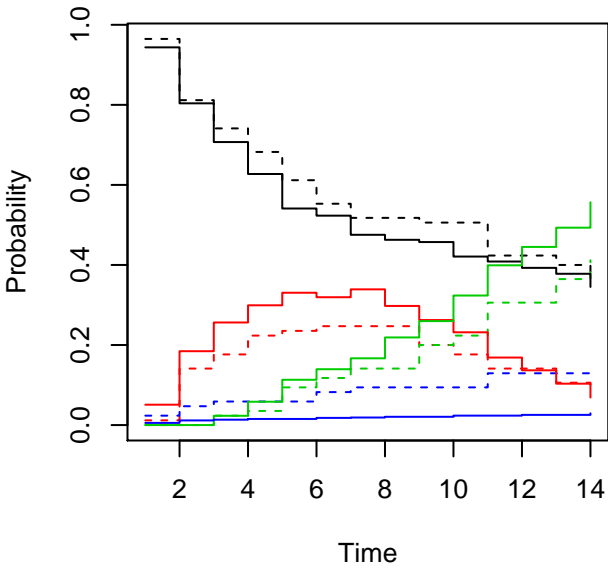

### ICU SOPs, under-treated

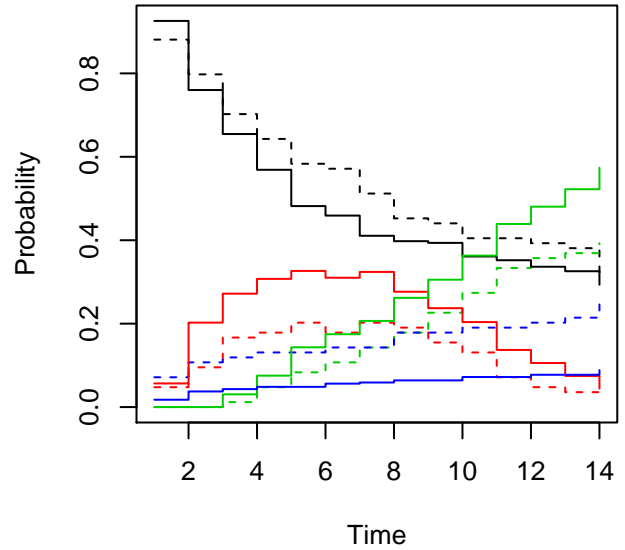

### ICU SOPs, over-treated

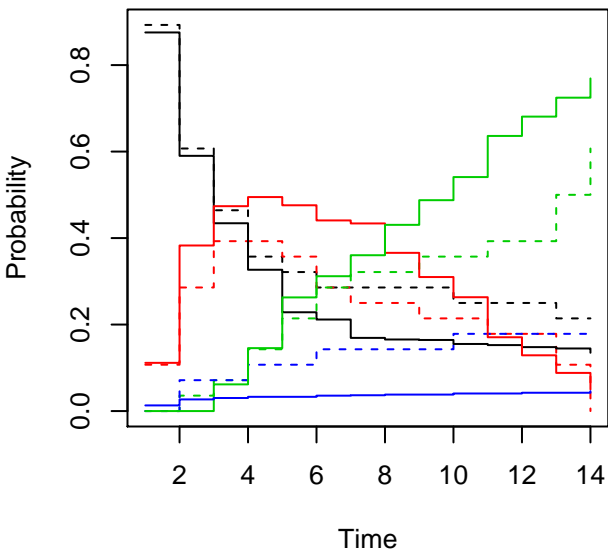

— Cox model (adjusted)

- - - Non-parametric

— Admission

— Clinically Stable

— Discharge

— Mortality
